# Supplementary material for: Novel nanoparticle-assembled Bi12GeO20 hierarchical structures: facile hydrothermal synthesis and excellent photocatalytic activity
Source: Royal Society of Chemistry journal article supplement (doi:10.1039/c6ra18623h), 2016-01-01
Supplement: c6ra18623h1.pdf [file c6ra18623h1.pdf]

## Electronic supplementary information

### Novel Nanoparticle-assembled $\text{Bi}_{12}\text{GeO}_{20}$ Hierarchical Structures: Facile Hydrothermal Synthesis and Excellent Photocatalytic Activity

Xin-Hua Huang<sup>a</sup>, Lei Zhang<sup>\*a, b</sup>, Jian Song<sup>a</sup>, Xiao-Feng Cao<sup>b</sup> and Yan-Chuan Guo<sup>\*b</sup>

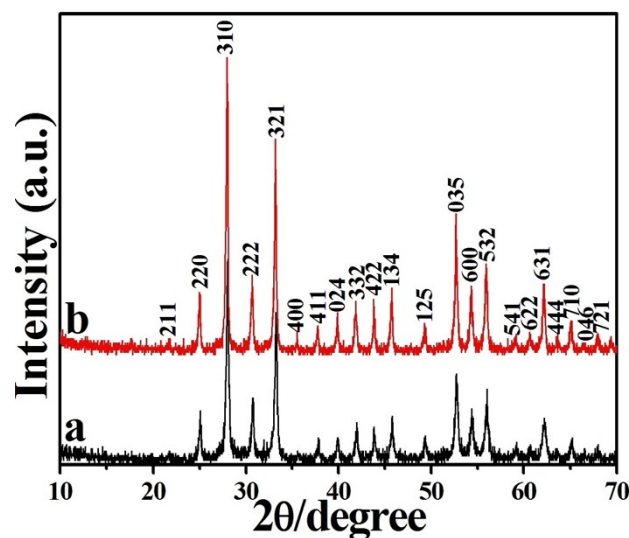

Fig. S1 XRD patterns of the samples prepared at different temperature: 60 (a) and 120 °C (b).

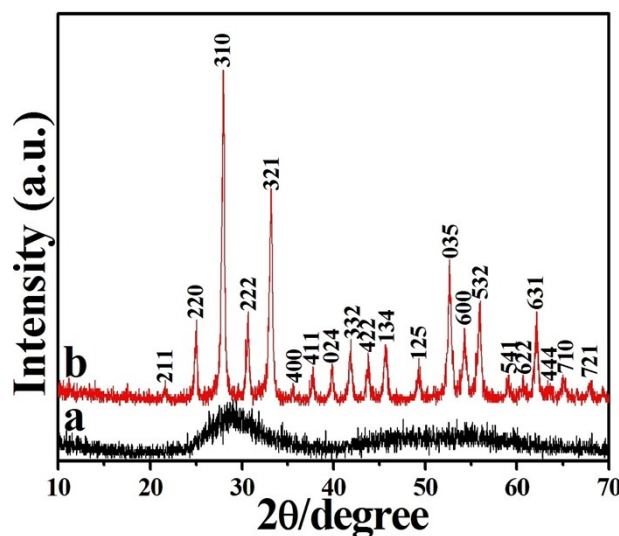

Fig. S2 XRD patterns of the samples with different amount of NaOH: 0.15 (a) and 0.45 g (b).

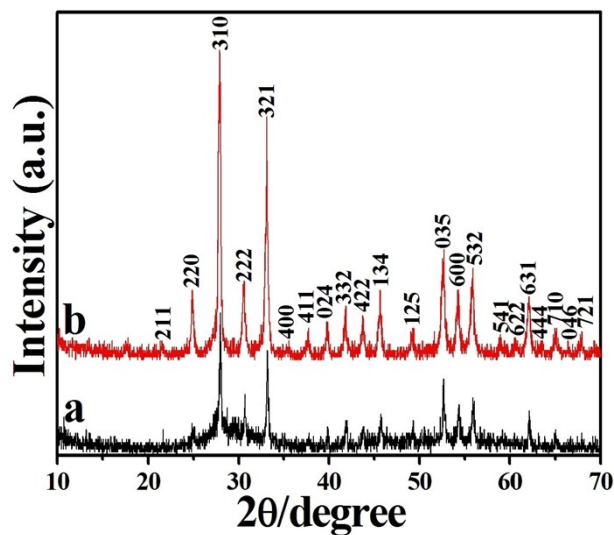

Fig. S3 XRD patterns of the samples with different alkaline source: LiOH (a) and KOH (b).

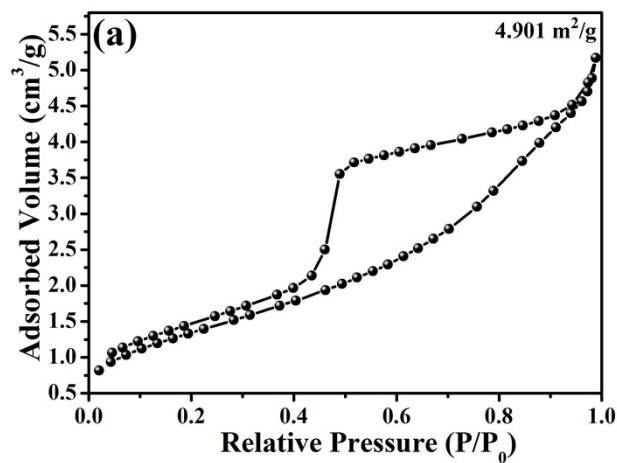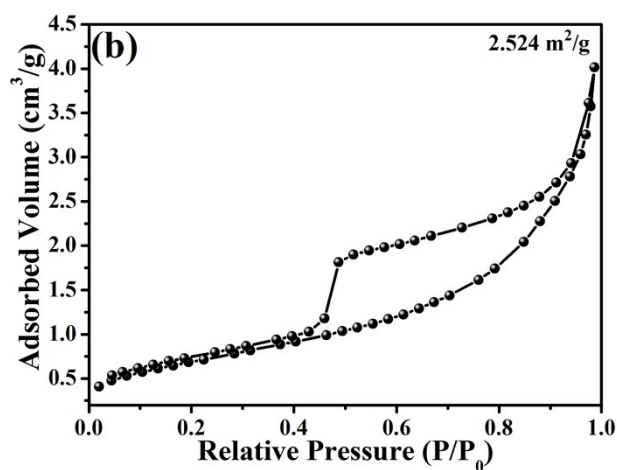

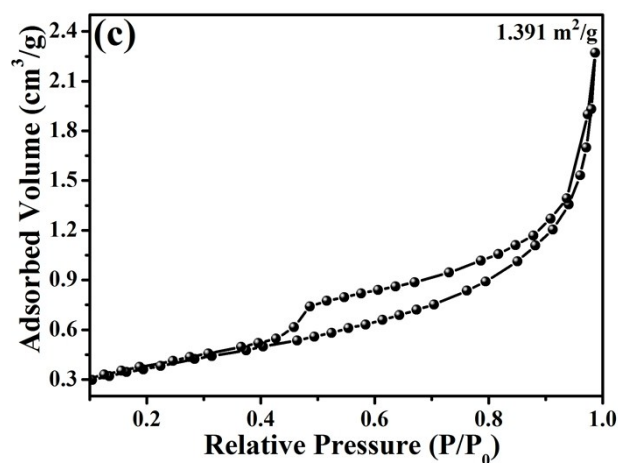

**Fig. S4** Nitrogen adsorption-desorption isotherms of the products prepared with different alkaline source: (a) NaOH, (b) KOH and (c) LiOH.

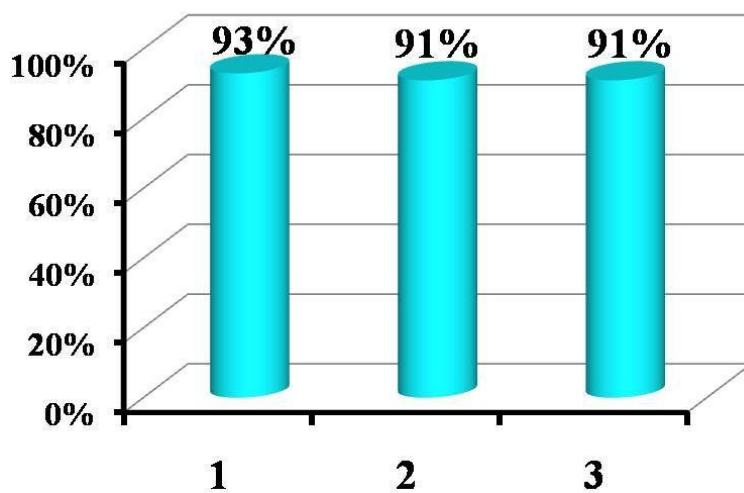

**Fig. S5** Degradation efficiencies of RhB over nanoparticle-assembled  $\text{Bi}_{12}\text{GeO}_{20}$  hierarchical structure (NaOH) during 3 catalytic runs.
